# Supplementary material for: Anticipation and Choice Heuristics in the Dynamic Consumption of Pain Relief
Source: PLoS Comput Biol. 2015 Mar 20;11(3):e1004030. doi: 10.1371/journal.pcbi.1004030 (PMC4368544; doi:10.1371/journal.pcbi.1004030)
Supplement: S2 Dataset — Data summarizing behavior on the previously published binary intertemporal choice task; the frequency with which each participant chose the sooner of the two options for delayed painful shocks in binary choice experiment (previously published, [33], S1 Table), and the maximum likelihood parameter estimates resulting from fitting an exponential dread-discounting model (previously published, [33], γP—framing model) to the observed choices. This file also contains the derived metric, d¯, used to classify behavior on the dynamic consumption experiment. (XLSX) [file pcbi.1004030.s011.xlsx]

## Sheet: Dread Discounting 
Dataset S2	A Priori Binary Intertemporal Choice Metrics and Dread-Discounting Parameters
Giles W Story March 2014
These data were are derived from a previously published experiment (Story et al., 2013 Dread and the Disvalue of Future Pain, PLoS Computational Biology DOI: 10.1371/journal.pcbi.1003335)
See the Methods section of the above paper for further details
They summarize behavior on a choice task in which participants made decisions between varying numbers of moderately painful cutaneous electric shock stimuli delivered to the dorsum of the hand at varying future time points.
The data were used to fit a model of intertemporal preferences which combined an estimate of dread with temporal discounting.
The same subjects also performed a dynamic relief consumption task, to allow comparison between the two tasks. The subject numbers here therfore correspond to those in Dataset S1.
Key to variables:
% Choose sooner pain	: the frequency with which each participant chose the sooner of the two options for delayed painful shocks in the above experiment, as detailed in Table S1 within Story et al., 2013
gD	: the discount factor applied to prospective dread itself, derived from binary choices between delayed pains (see Story et al., 2013)
α	: the weighting given to prospective dread , derived from binary choices between delayed pains (see Story et al., 2013)
gP Pain	: the discount factor applied to pain itself, also governing the hypothesized increase in instantaneous dread, derived from binary choices between delayed pains (see Story et al., 2013)
Save	: the negative mean signed deviation across trials in consumption of relief from the mean remaining relief per trial; in other words how much less than the mean relief remaining per trial a participant consumes on average; these statistics are derived from the consumption choices of each participant (Dataset S1); see Methods for details
Deviate from Spread	: the absolute mean deviation across trials in consumption of relief from the mean remaining relief per trial; in other words how mcuh on average a participant's spending deviated from even relief spreading across time
NA	Subjects highlighted in gray ("Not Analyzed") were excluded from the analysis since they were not provided with on-screen details of the mean relief remaining per trial
NE	"Not Estimable": indicates that these participants chose sooner pain 100% of the time in at least one of the experimental frames in this study, rendering parameter estimation unreliable.
	Binary choice experiment (Story et al., 2013)				Dynamic choice experiment
	% Choose sooner pain	gD	α	gP Pain	Save (mean d)	Deviate from Spread (|mean d|)
'Subject 1'	96.8	NE	NE	NE	1.42114	1.42114
'Subject 2'	100	NE	NE	NE	2.04922	2.04922
'Subject 3'	63.2	0.817165	0.0874805	0.999327	5.34231	5.34231
'Subject 4'	53.7	0.000538708	0.531433	0.998808	21.4579	21.4579
'Subject 5'	100	NE	NE	NE	6.10937	6.10937
'Subject 6'	68.4	1	1	0.8405	6.39644	6.39644
'Subject 7'	29.5	1	0.106567	0.740201	52.3807	52.3807
'Subject 8'	95.8	1	1	0.88878	5.17998	5.17998
'Subject 9'	NA	NA	NA	NA	NA	NA
'Subject 10'	NA	NA	NA	NA	NA	NA
'Subject 11'	90.5	NE	NE	NE	20.9582	20.9582
'Subject 12'	100	NE	NE	NE	30.4762	30.4762
'Subject 13'	42.1	1	0.617075	0.56412	6.94375	6.94375
'Subject 14'	66.3	0.997858	0.286895	0.842242	43.2202	43.2202
'Subject 15'	37.9	0.578653	1	0.775936	-2.85536	2.85536
'Subject 16'	57.9	1	0.0079028	1	19.2952	19.2952
'Subject 17'	92.6	0.907727	1	0.997963	-0.309699	0.309699
'Subject 18'	92.6	1	0.156373	0.958087	23.5035	23.5035
'Subject 19'	63.2	0.907865	0.0333914	1	15.1453	15.1453
'Subject 20'	72.6	0.86646	0.0519499	1	10.2289	10.2289
'Subject 21'	72.6	0.571372	0.717037	1	2.3415	2.3415
'Subject 22'	72.6	0.793536	0.162969	0.99945	41.1578	41.1578
'Subject 23'	NA	NA	NA	NA	NA	NA
'Subject 24'	49.5	1	1	0.463516	25.252	25.252
'Subject 25'	69.5	0.985204	0.551937	0.824799	15.2191	15.2191
'Subject 26'	46.3	1	0.0482696	0.950446	35.0554	35.0554
'Subject 27'	98.9	0.982244	1	1	2.55454	2.55454
'Subject 28'	47.4	1	0.219223	0.810102	35.6761	35.6761
'Subject 29'	88.4	0.848768	0.189369	1	20.2623	20.2623
'Subject 30'	95.8	1	0.742986	0.877483	-12.174	12.174
'Subject 31'	97.9	NE	NE	NE	-0.25113	0.25113
'Subject 32'	100	NE	NE	NE	2.26309	2.26309
'Subject 33'	36.8	0.691388	1	0.234297	-18.4084	18.4084
